# Supplementary material
Source: publisher figshare collection journal article supplement (https://acs.figshare.com/ndownloader/files/20727699)

## Supplemental Tables and Figure.

**Supplemental Table 1. Composition and nutritional values of the experimental diets.**

| <i>Ingredients (g/kg)</i> |                                           | NC   | HC-Con | HC-CamC24/C16 |
|---------------------------|-------------------------------------------|------|--------|---------------|
|                           | Fish protein (from fish)                  | 40.0 |        |               |
|                           | Plant protein (soy meal)                  | 80.0 |        |               |
|                           | Cereals (wheat, corn, barley, wheat bran) | 839  |        |               |
|                           | Casein                                    |      | 210    | 171           |
|                           | Corn starch                               |      | 115    | 115           |
|                           | Sucrose                                   |      | 233    | 233           |
|                           | Lard                                      |      | 229    | 229           |
|                           | Camelina oil                              |      | 21.0   | -             |
|                           | Camelina meal                             |      | -      | 107           |
|                           | AIN-93M mineral mix                       |      | 40.0   | 33.8          |
|                           | AIN-93M vitamin mix                       |      | 10.0   | 10.0          |
|                           | Mineral & vitamin mix                     | 41.0 |        |               |
|                           | $\alpha$ -Cellulose                       |      | 50.0   | 15.4          |
|                           | Choline                                   |      | 2.0    | 2.0           |
|                           | Water                                     |      | 90.0   | 83.8          |
| <i>Nutritional values</i> |                                           |      |        |               |
| Weight %                  | Protein                                   | 16.1 |        | 21.0          |
|                           | Carbohydrate                              | 60.4 |        | 34.8          |
|                           | Lipid                                     | 3.1  |        | 25.0          |
|                           | Fibres                                    | 3.9  |        | 5.0           |
|                           | Ashes                                     | 3.9  |        | 4.0           |
|                           | Humidity                                  | 11.9 |        | 9.0           |
| Energy content (kcal/kg)  |                                           | 3340 |        | 4480          |
| Energy %                  | Protein                                   | 19.3 |        | 18.7          |
|                           | Carbohydrate                              | 72.4 |        | 31.1          |
|                           | Lipid                                     | 8.4  |        | 50.2          |

Composition and nutritional value of the NC diet (pellets) were as provided by the manufacturer; nutritional value of the three HC diets was calculated from that of the ingredients, including the composition of the camelina meals as described in the Materials & Methods section.

**Supplemental Table 2. SL composition of the camelina meals (nmol/g)**

|                                                            | Camelina meal C24 | Camelina meal C16 |
|------------------------------------------------------------|-------------------|-------------------|
|                                                            | nmol/g            | nmol/g            |
| Total Cer                                                  | 65.0              | 80.1              |
| C16-Cer                                                    | 7.01              | 29.4              |
| C24-Cer                                                    | 24.6              | 20.2              |
| Total hCer                                                 | 168               | 167               |
| C16-hCer                                                   | 4.59              | 19.0              |
| C24-hCer                                                   | 70.7              | 65.8              |
| Total GluCer                                               | 107               | 72                |
| C16-GluCer                                                 | 16.8              | 42.8              |
| C24-GluCer                                                 | 70.5              | 18.5              |
| Total NH <sub>2</sub> GIPC                                 | 3752              | 3679              |
| C16-NH <sub>2</sub> GIPC                                   | 69                | 3316              |
| C24-NH <sub>2</sub> GIPC                                   | 3082              | 271               |
| Total SL                                                   | 4093              | 3998              |
| C16-SL                                                     | 29.2              | 3407              |
| C24-SL                                                     | 3248              | 375               |
| Total NH <sub>2</sub> GIPC (% of total SL)                 | 91.7              | 92.0              |
| C16-NH <sub>2</sub> GIPC (% of total NH <sub>2</sub> GIPC) | 1.84              | 90.1              |
| C24-NH <sub>2</sub> GIPC (% of total NH <sub>2</sub> GIPC) | 82.1              | 7.37              |

Camelina meals C24 and C16 originated from the Céline and LOH2<sup>Y</sup> cultivars, respectively. Cer, ceramide; hCer, hydroxyceramide; GluCer, glucosyl-ceramide; NH<sub>2</sub>GIPC, aminoglycosyl-inositol-phosphoryl-ceramide.

**Supplemental Table 3. Body weight gain and food intake**

|                                          | NC                     | HC-Con                 | HC-CamC24              | HC-CamC16              | <i>P</i> ANOVA |
|------------------------------------------|------------------------|------------------------|------------------------|------------------------|----------------|
| Body weight gain after 5 wk (g)          | 3.47±1.06 <sup>b</sup> | 8.78±2.98 <sup>a</sup> | 5.21±1.24 <sup>b</sup> | 5.08±1.07 <sup>b</sup> | <0.0001        |
| BW after 1 wk (g)                        | 25.0±1.7 <sup>a</sup>  | 26.9±1.8 <sup>a</sup>  | 25.6±1.0 <sup>a</sup>  | 26.0±1.1 <sup>a</sup>  | 0.0082         |
| Food intake after 6 d (kcal/d)           | 12.1±0.6 <sup>b</sup>  | 14.7±1.6 <sup>a</sup>  | 12.7±1.4 <sup>b</sup>  | 13.3±0.9 <sup>ab</sup> | 0.0028         |
| Food intake after 6 d (kcal/100 g BW/d)  | 48.9±4.5 <sup>a</sup>  | 54.6±5.0 <sup>a</sup>  | 49.5±5.5 <sup>a</sup>  | 51.1±4.1 <sup>a</sup>  | 0.0972         |
| Digestibility after 6 d (%)              | 79.2±1.4 <sup>c</sup>  | 90.8±1.0 <sup>b</sup>  | 92.5±1.0 <sup>a</sup>  | 91.1±0.5 <sup>a</sup>  | <0.0001        |
| BW after 4 wk (g)                        | 26.1±1.7 <sup>b</sup>  | 30.1±3.2 <sup>a</sup>  | 27.8±1.5 <sup>ab</sup> | 27.7±1.4 <sup>ab</sup> | 0.0074         |
| Food intake after 4 wk (kcal/d)          | 11.8±0.5 <sup>ab</sup> | 13.6±1.2 <sup>a</sup>  | 11.1±1.7 <sup>b</sup>  | 12.0±1.7 <sup>ab</sup> | 0.0073         |
| Food intake after 4 wk (kcal/100 g BW/d) | 45.3±2.3 <sup>a</sup>  | 44.3±3.3 <sup>a</sup>  | 40.0±6.1 <sup>a</sup>  | 43.2±6.3 <sup>a</sup>  | 0.1803         |
| Digestibility after 4 wk (%)             | 81.6±1.0 <sup>c</sup>  | 90.7±1.2 <sup>b</sup>  | 92.5±1.0 <sup>a</sup>  | 91.1±0.5 <sup>b</sup>  | <0.0001        |

Food intake was measured after 4 weeks on the experimental diets.

BW, body weight; NC, normo-caloric; HC, hyper-caloric; Con, control; CamC24, camelina meal C24 (from the commercial Céline cultivar rich in C24 fatty acids); CamC16, camelina meal C16 (from the experimental LOH2 cultivar rich in C16 fatty acids).

**Supplemental Figure 1.** NH<sub>2</sub>GIPCs and GluCers profiles in *Camelina sativa* seeds from the commercial Céline cultivar (CamC24) and from the LOH2<sup>Y</sup> line (CamC16).

NH<sub>2</sub>GIPC and GluCer amounts were shown according to their FA length hydroxylated (h) or nor (c) and to the nature of their LCB moieties [sphinganine (d18:0), sphingenine (d18:1), hydroxysphinganine (t18:0), hydroxysphingenine (t18:1)].

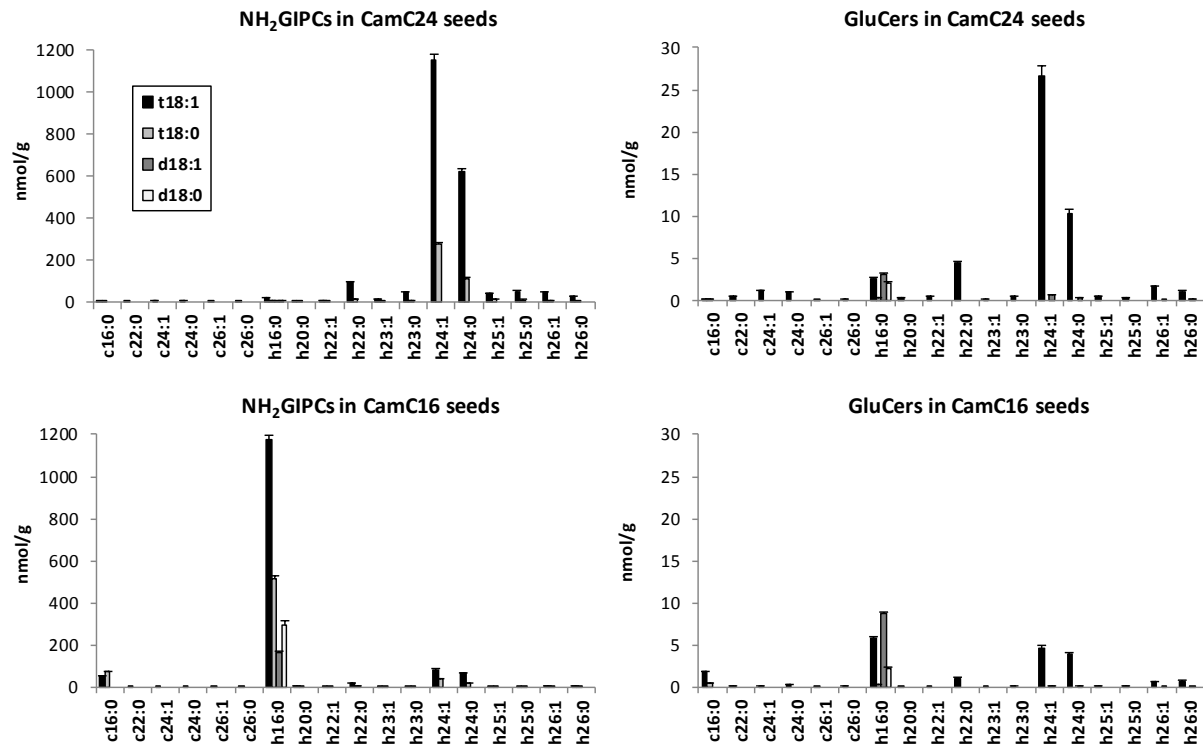

Supplement: Supplementary file 1 [file 20727699]
